# Supplementary material for: Diversity and structural‐functional insights of alpha‐solenoid proteins
Source: PubMed Central journal article supplement (PMC11514114; doi:10.1002/pro.5189), 2024-10-28
Supplement: PRO-33-e5189-s001.pdf [file PRO-33-e5189-s001.pdf]

# Supporting Information

## Diversity and structural-functional insights of alpha-solenoid proteins

Paula Nazarena Arrías<sup>1,2†</sup>, Zarifa Osmanli<sup>1†</sup>, Estefanía Peralta<sup>3</sup>, Patricio Manuel Chinestrada<sup>4</sup>,  
Alexander Miguel Monzon<sup>5</sup>, Silvio C.E. Tosatto<sup>1,6\*</sup>

† These authors contributed equally to this work.

\* To whom correspondence should be addressed: [silvio.tosatto@unipd.it](mailto:silvio.tosatto@unipd.it)

<sup>1</sup> Department of Biomedical Sciences, University of Padova, via U. Bassi 58/b, 35121 Padova, Italy

<sup>2</sup> Department of Protein Science, KTH Royal Institute of Technology, Stockholm SE-10691, Sweden

<sup>3</sup> Laboratorio de Investigación y Desarrollo de Bioactivos (LIDeB), Departamento de Ciencias Biológicas, Facultad de Ciencias Exactas, Universidad Nacional de La Plata, B1900ADU La Plata, Buenos Aires, Argentina.

<sup>4</sup> Laboratorio de Farmacología Molecular, Universidad Nacional de Quilmes, Roque Saenz Peña 352, 1876 Bernal, Buenos Aires, Argentina

<sup>5</sup> Department of Information Engineering, University of Padova, via Giovanni Gradenigo 6/B, 35131 Padova, Italy

<sup>6</sup> Institute of Biomembranes, Bioenergetics and Molecular Biotechnologies, National Research Council (CNR-IBIOM), Bari, Italy

**Keywords:** alpha-solenoid subfolds, repeat evolution, protein sequence logo, repeat structure, amino acid conservation

| Abbreviation | Name              | Interpro repeat | GO terms associated with the Interpro repeat | Interpro homologous superfamily | Pfam            | Pfam clan | CATH ID    | Structural unit            | Representative structure (PDB) |
|--------------|-------------------|-----------------|----------------------------------------------|---------------------------------|-----------------|-----------|------------|----------------------------|--------------------------------|
|              |                   |                 |                                              |                                 | PF12796         |           |            |                            |                                |
|              |                   |                 |                                              |                                 | PF13606         |           |            | $\alpha/\alpha$ /big loop  |                                |
|              |                   |                 |                                              |                                 | PF13857         |           |            | or                         |                                |
|              |                   |                 |                                              |                                 | PF13637         |           |            | $\alpha/\alpha$ /beta-hair |                                |
| ANK          | Ankyrin           | IPR002110       | GO:0005515                                   | IPR036770                       | PF00023         | CL0465    | 1.25.40.20 | pin                        | 1N11_A                         |
|              |                   |                 |                                              |                                 | PF13174         |           |            |                            |                                |
|              |                   |                 |                                              |                                 | PF13181         |           |            |                            |                                |
|              |                   |                 |                                              |                                 | PF13176         |           |            |                            |                                |
| TPR          | Tetratricopeptide | IPR01973        | GO:0005515                                   | IPR011990                       | PF00515         | CL0020    | 1.25.40.10 | $\alpha/\alpha$            | 4Y6W_A                         |
|              |                   |                 |                                              |                                 | IPR00035        |           |            |                            |                                |
| HEAT         | HEAT              | 7               | GO:0005515                                   | IPR016024                       | PF02985         | CL0020    | 1.25.10.10 | $\alpha/\alpha$            | 4I5N_D                         |
|              |                   |                 |                                              |                                 | IPR00131        |           |            |                            |                                |
| PUF          | Pumilio           | 3               | GO:0003723                                   | IPR016024                       | PF22493         | CL0020    | 1.25.10.10 | $\alpha/\alpha/\alpha$     | 3V71_A                         |
|              |                   |                 |                                              |                                 | PF12854         |           |            |                            |                                |
|              |                   |                 |                                              |                                 | PF13041         |           |            |                            |                                |
|              |                   |                 |                                              |                                 | PF13812         |           |            |                            |                                |
| PPR          | opeptide          | 5               | N/A                                          | IPR011990                       | PF01535         | CL0020    | 1.25.40.10 | $\alpha/\alpha$            | 4M57_A                         |
|              |                   |                 |                                              |                                 | IPR00022        |           |            |                            |                                |
| ARM          | Armadillo         | 5               | GO:0005515                                   | IPR016024                       | PF00514         | CL0020    | 1.25.10.10 | $\alpha/\alpha/\alpha$     | 4DJS_A                         |
|              |                   |                 |                                              |                                 | TAL             |           |            |                            |                                |
|              |                   |                 |                                              |                                 | effector repeat |           |            |                            |                                |
| TAL          | repeat            | 2               | N/A                                          | N/A                             | PF03377         | CL0020    | N/A        | $\alpha/\alpha$            | 3UGM_A                         |
|              |                   |                 |                                              |                                 | Sel1-like       |           |            |                            |                                |
| Sel1         | repeats           | 7               | N/A                                          | IPR011990                       | PF08238         | CL0020    | 1.25.40.10 | $\alpha/\alpha$            | 5B26_A                         |

**Table S1 – Alpha-solenoid subfolds.** Database identifiers, representative structures, GO terms correspond to protein and DNA/RNA binding (UniProtKB accessed on 17 June 2024).
